# Supplementary material for: Alkaloids Modulate the Functioning of Ion Channels Produced by Antimicrobial Agents via an Influence on the Lipid Host
Source: PubMed Central journal article supplement (PMC7339123; doi:10.3389/fcell.2020.00537), 2020-06-30
Supplement: Data_Sheet_1.pdf [file Data_Sheet_1.pdf]

## Supplementary Material

### 1.1 Supplementary Figures

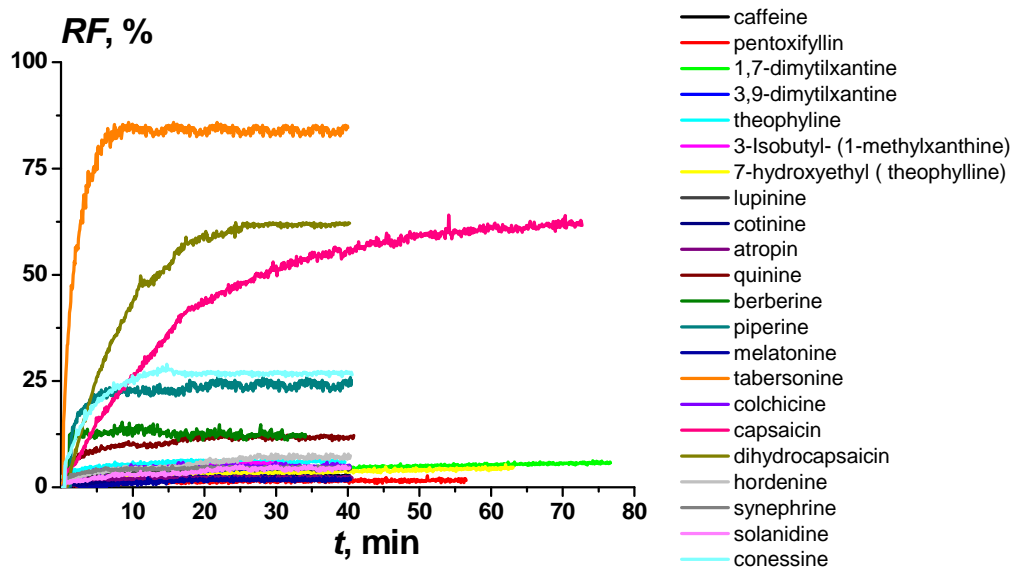

**Supplementary Figure 1.** The time dependence of relative fluorescence of calcein ( $RF, \%$ ) leaked from POPC vesicles. Alkaloids were added into the liposomal suspension up to a concentration of 0.4 mM at the first time point. The relationship between the color line and the compound is given in the figure.

## 1.2 Supplementary Tables

**Supplementary TABLE 1S.** The physicochemical properties of tested alkaloids:  $pK_a$  – the logarithm of acid dissociation constant,  $\text{LogD}_{o/w}$  – the logarithm of octanol/water distribution coefficient at pH 7.4,  $\text{LogP}_{o/w}$  – the logarithm of octanol/water partition coefficient,  $\mu$  – molecule dipole moment.

| <i>Alkaloid</i>                                        | <i>pKa</i> *  |              | $\text{LogD}_{o/w}$ * | $\text{LogP}_{o/w}$ <sup>#</sup> | <b>Reference</b>                                                                                                                  | $\mu^{\$}$ , D | $\mu^{\#}$ , D | <b>Reference</b>                           |
|--------------------------------------------------------|---------------|--------------|-----------------------|----------------------------------|-----------------------------------------------------------------------------------------------------------------------------------|----------------|----------------|--------------------------------------------|
|                                                        | <i>acidic</i> | <i>basic</i> |                       |                                  |                                                                                                                                   |                |                |                                            |
| <i>caffeine</i>                                        |               | -0.92        | -0.55                 | -0.07, -0.08                     | Gaspari and Bonati, 1987; Lombardo et al., 2001; Kupsakova et al., 2004; Machatha and Yalkowsky, 2005; Schonsee and Bucheli, 2020 | 3.29           | 4.58, 4.23     | Aaron and Gaye, 1987; Fischer et al., 1999 |
| <i>pentoxifylline</i>                                  | 19.64         | -0.93        | 0.23                  | 0.29, 0.12                       | Lombardo et al., 2001; Hollosy et al., 2006                                                                                       | 5.44           | 4.78           | Augusto and Quintanilla, 2010              |
| <i>1,7-dimethylxanthine</i>                            | 10.76         | -0.87        | 0.24                  | -0.24                            | Gaspari and Bonati, 1987                                                                                                          | 3.59           | <i>na</i>      | –                                          |
| <i>3,9-dimethylxanthine</i>                            | 8.99          | 1.09         | -0.82                 | <i>na</i>                        |                                                                                                                                   | 7.29           | <i>na</i>      | –                                          |
| <i>theophylline</i>                                    | 7.82          | -0.78        | -0.89                 | -0.04, -0.02                     | Gaspari and Bonati, 1987; Kupsakova et al., 2004; Machatha and Yalkowsky, 2005                                                    | 6.53           | 4.64, 7.66     | Aaron and Gaye, 1987                       |
| <i>3-isobutyl-1-methylxanthine</i>                     | 11.41         | 2.42         | 0.40                  | 1.46 <sup>&amp;</sup>            | Kupsakova et al., 2004                                                                                                            | 6.99           | <i>na</i>      | –                                          |
| <i>7-(<math>\beta</math>-hydroxyethyl)theophylline</i> | 15.43         | -1.25        | -1.24                 | <i>na</i>                        | –                                                                                                                                 | 2.26           | <i>na</i>      | –                                          |
| <i>lupinine</i>                                        | 15.42         | 9.88         | -1.52                 | <i>na</i>                        | –                                                                                                                                 | 1.24           | <i>na</i>      | –                                          |
| <i>cotinine</i>                                        |               | 4.79         | 0.21                  | 0.07                             | Li et al., 1992                                                                                                                   | 4.95           | <i>na</i>      | –                                          |
| <i>atropine</i>                                        | 15.15         | 9.39         | -0.41                 | -0.55, 1.32, 1.82                | Lombardo et al., 2001; Kuo et al., 2004; Machatha and Yalkowsky, 2005                                                             | 3.58           | 4.39           | Kuo et al., 2004                           |

|                         |       |           |       |             |                                                    |           |                   |                                                     |
|-------------------------|-------|-----------|-------|-------------|----------------------------------------------------|-----------|-------------------|-----------------------------------------------------|
| <i>quinine</i>          | 13.89 | 9.05      | 0.86  | 2.36, 2.79  | Machatha and Yalkowsky, 2005; Hollosy et al., 2006 | 2.39      | 2.17              | Karle and Bhattacharjee, 1999                       |
| <i>berberine</i>        |       | <i>na</i> | -1.28 | -1.03, -1.5 | Schonsee and Bucheli, 2020; Wang et al., 2012      | <i>na</i> | <i>na</i>         | –                                                   |
| <i>piperine</i>         |       | -0.13     | 2.78  | 2.25        | Wu et al., 2012                                    | 5.37      | 5.98, 6.36        | Gokalp, 2016                                        |
| <i>melatonin</i>        | 15.8  | -1.60     | 1.15  | 1.39, 1.2   | Yu et al., 2016; Kanikkannan et al., 2001          | 4.93      | 4.76, 6.29        | Zavodnik et al., 2006; Galijasevic and Hodzic, 2012 |
| <i>tabersonine</i>      | 14.07 | 9.08      | 0.90  | <i>na</i>   | –                                                  | 1.28      | <i>na</i>         | –                                                   |
| <i>colchicine</i>       | 15.06 | -0.04     | 1.46  | 1.14, 1.2   | Schonsee and Bucheli, 2020; Hollosy et al., 2006   | 6.53      | <i>na</i>         | –                                                   |
| <i>capsaicin</i>        | 9.93  | -0.52     | 3.75  | 3.8         | Hanson et al., 2015                                | 4.66      | 3.96              | Pereira et al., 2019                                |
| <i>dihydrocapsaicin</i> | 9.93  | -0.52     | 4.11  | <i>na</i>   | –                                                  | 4.95      | <i>na</i>         | –                                                   |
| <i>hordenine</i>        | 10.31 | 9.19      | 0.06  | <i>na</i>   | –                                                  | 0.99      | 1.49              | Dwivedi et al., 2014                                |
| <i>synephrine</i>       | 9.76  | 9.15      | -1.39 | -0.45       | Hansch and Zhang, 1995                             | 2.32      | 2.82 <sup>@</sup> | Cabezas et al., 2013                                |
| <i>solanidine</i>       | 18.2  | 12.47     | 1.39  | <i>na</i>   | –                                                  | 1.24      | <i>na</i>         | –                                                   |
| <i>conessine</i>        |       | 10.53     | -1.45 | <i>na</i>   | –                                                  | 1.81      | <i>na</i>         | –                                                   |

\*The values of pKa and LogD<sub>0/w</sub> were predicted by ChemAxon

<sup>§</sup>Calculations of the dipole moments of the alkaloid molecules were performed by HyperChem 7.0 (Hypercube, Inc., Gainesville, FL, USA) using the semi-empirical MNDO

# Available literature data

& Partition coefficient of 1-isobutyl-3-methylxanthine

<sup>@</sup> Mean dipole moment of low-energy conformers

*na* = Not available

### 1.3 Supplementary References

Aaron, J.J., Gaye, M.D. (1987). Experimental and theoretical dipole moment of purines in their ground and lowest excited singlet states. *J. Mol. Struct.* 156, 119-135.

Augusto, V., Quintanilla, Y. (2010). Rejection of emerging organic contaminants by nanofiltration and reverse osmosis membranes: effects of fouling, modelling and water reuse. 1st Edition, P.216, doi:10.1201/b10832.

Cabezas, C., Simão, A., Bermúdez, C., Varela, M., Peña, I., Mata, S., Fausto, R., Alonso, J.L. (2013). Conformational analysis of octopamine and synephrine in the gas phase. *J. Phys. Chem. A.* 117, 4907-4915. doi:10.1021/jp4032223.

Dwivedi, A., Dubey, V., Bajpai, A.K. (2014). A quantum chemical comparative study of epinine and hordenine. *Int. J. Chem. Stud.* 2, 20-26.

Fischer, B., Yefidoff, R., Major, D.T., Rutman-Halili, I., Shneyvays, V., Zinman, T., Jacobson, K.A., Shainberg, A. (1999). Characterization of "mini-nucleotides" as P2X receptor agonists in rat cardiomyocyte cultures. An integrated synthetic, biochemical, and theoretical study. *J. Med. Chem.* 42, 2685-2696. doi:10.1021/jm990085i.

Galijasevic, S., Hodzic, E. (2012). Theoretical studies of structures and thermodynamic parameters of melatonin and its metabolites: N1-Acetyl-N2-formyl-5-methoxy kynuramine and N1-Acetyl-5-methoxykynuramine. *Bull. Chem. Technol. Bosn. Herzeg.* 39, 39-43.

Gaspari, F., Bonati, M. (1987). Correlation between n-octanol/water partition coefficient and liquid chromatographic retention for caffeine and its metabolites: and some structure-pharmacokinetic considerations. *J. Pharm. Pharmacol.* 39, 252-260.

Gökalp, F. (2016). A study on piperine, active compound of black pepper. *Acad. Plat. J. Engineer. Sci.* 4, 18-24. doi:10.21541/apjes.66230

Hansch, C., Zhang, L. (1995). Comparative QSAR: radical toxicity and scavenging. Two different sides of the same coin. *SAR QSAR Environ. Res.* 4, 73-82. doi:10.1080/10629369508029905.

Hanson, S.M., Newstead S., Swartz, K.J., Sansom, M.S.P. (2015). Capsaicin interaction with TRPV1 channels in a lipid bilayer: molecular dynamics simulation. *Biophys. J.* 108, 1425-1434. doi:10.1016/j.bpj.2015.02.013.

Hollosy, F., Valko, K., Hersey, A., Nunhuck, S., Keri, G., Bevan, C. (2006). Estimation of volume of distribution in humans from high throughput HPLC-based measurements of human serum albumin (HSA) binding and immobilized artificial membrane (IAM) partitioning. *J. Med. Chem.* 49, 6958-6971. doi:10.1021/jm050957i.

Kanikkannan, N., Jackson, T., Shaik, M.S., Singh, M. (2001). Evaluation of skin sensitization potential of melatonin and nimesulide by murine local lymph node assay. *Eur. J. Pharm. Sci.* 14, 217-220. doi:10.1016/s0928-0987(01)00176-2.

- Karle, J.M., Bhattacharjee, A.K. (1999). Stereoelectronic features of the cinchona alkaloids determine their differential antimalarial activity. *Bioorg. Med. Chem.* 7, 1769-1774. doi:10.1016/s0968-0896(99)00120-0.
- Kuo, C.L., Wang, R.B., Shen, L.J., Lien, L.L., Lien, E.J. (2004). G-protein coupled receptors: SAR analyses of neurotransmitters and antagonists. *J. Clin. Pharm. Ther.* 29, 279-298. doi:10.1111/j.1365-2710.2004.00563.x.
- Kupsakova, I., Rybár, A., Docolomanský, P., Drobná, Z., Stein, U., Walther, W., Barancík, M., Breier, A. (2004). Reversal of P-glycoprotein mediated vincristine resistance of L1210/VCR cells by analogues of pentoxifylline A QSAR study. *Eur. J. Pharm. Sci.* 21, 283-293. doi:10.1016/j.ejps.2003.10.019.
- Li, N.Y., Li, N., Gorrod, J.W. (1992). Determination of partition coefficients and ionisation constants of (S)(-)-nicotine and certain metabolites. *Med. Sci. Res.* 20, 901-902.
- Lombardo, F., Shalaeva, M.Y., Tupper, K.A., Gao, F. (2001). ElogDoct: a tool for lipophilicity determination in drug discovery. 2. Basic and neutral compounds. *J. Med. Chem.* 44, 2490-2497. doi:10.1021/jm0100990.
- Machatha, S.G., Yalkowsky, S.H. (2005). Comparison of the octanol/water partition coefficients calculated by ClogP®, ACDlogP and KowWin® to experimentally determined values. *Int. J. Pharm.* 294, 185-192. doi:10.1016/j.ijpharm.2005.01.023.
- Pereira, G.J.V., Tavares, M.T., Azevedo, R.A., Martins, B.B., Cunha, M.R., Bhardwaj, R., Cury, Y., Zambelli, V.O., Barbosa, E.G., Hediger, M.A., Parise-Filho, R. (2019). Capsaicin-like analogue induced selective apoptosis in A2058 melanoma cells: Design, synthesis and molecular modeling. *Bioorg. Med. Chem.* 27, 2893-2904. doi:10.1016/j.bmc.2019.05.020.
- Schonsee, C.D., Bucheli, T.D. (2020). Experimental determination of octanol–water partition coefficients of selected natural toxins. *J. Chem. Eng. Data.* 65, 1946–1953. doi:10.1021/acs.jced.9b01129
- Wang, J.R., Tanaka, T., Zhang, H., Kouno, I., Jiang, Z.H. (2012). Formation and conformation of baicalin–berberine and wogonoside–berberine complexes. *Chem. Pharm. Bull. (Tokyo)*. 60, 706-711. doi:10.1248/cpb.60.706.
- Wu, Z.J., Xia, X.J., Huang, X.S. (2012). Determination of equilibrium solubility and apparent oil/water partition coefficient of piperine. *J. Jinan Univ.(Nat. Sci. & Med. Edit.)*. 2012-05.
- Yu, H., Dickson, E.J., Jung, S.R., Koh, D.S., Hille, B. (2016). High membrane permeability for melatonin. *J. Gen. Physiol.* 147, 63–76. doi:10.1085/jgp.201511526.
- Zavodnik, I.B., Domanski, A.V., Lapshina, E.A., Bryszewska, M., Reiter, R.J. (2006). Melatonin directly scavenges free radicals generated in red blood cells and a cell-free system: chemiluminescence measurements and theoretical calculations. *Life Sci.* 79, 391-400. doi:10.1016/j.lfs.2006.01.030.
